# Supplementary material for: Improved survival in real‐world patients with advanced urothelial carcinoma: A multicenter propensity score‐matched cohort study comparing a period before the introduction of pembrolizumab (2003–2011) and a more recent period (2016–2020)
Source: PubMed Central journal article supplement (PMC10087413; doi:10.1111/iju.15014), 2022-08-22

**(A) Era**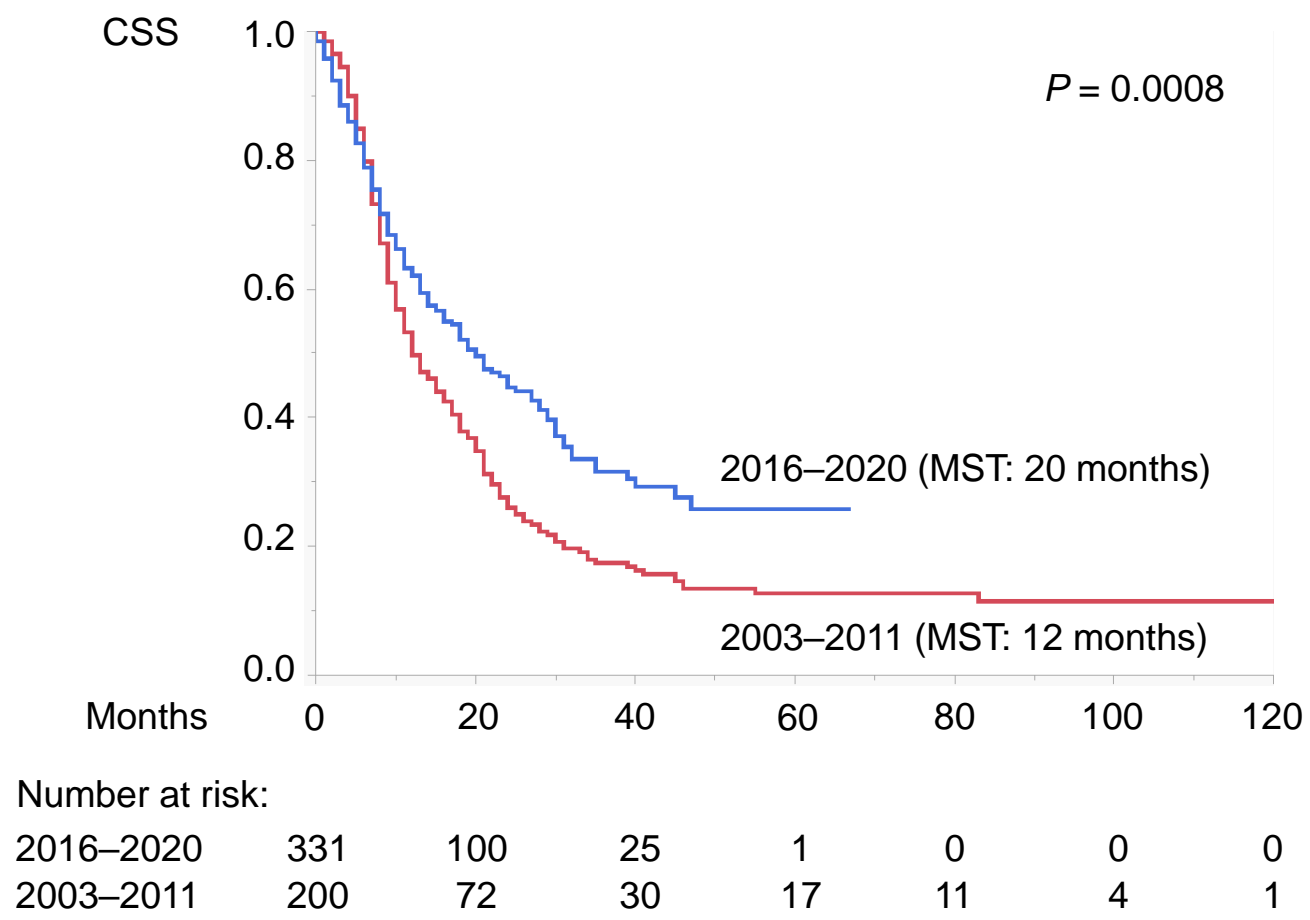**(B) Era**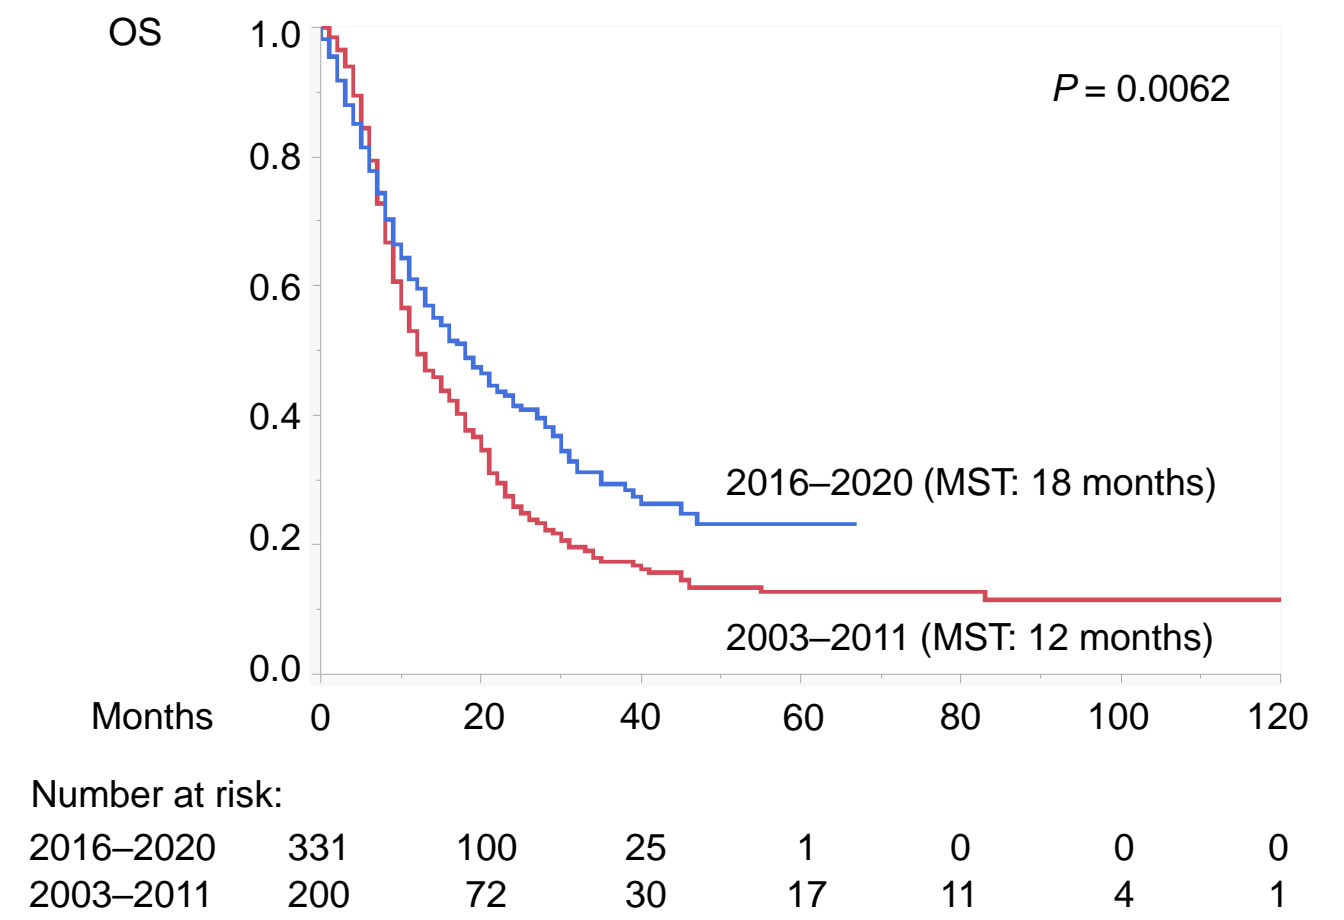**(C) Overall pembrolizumab use**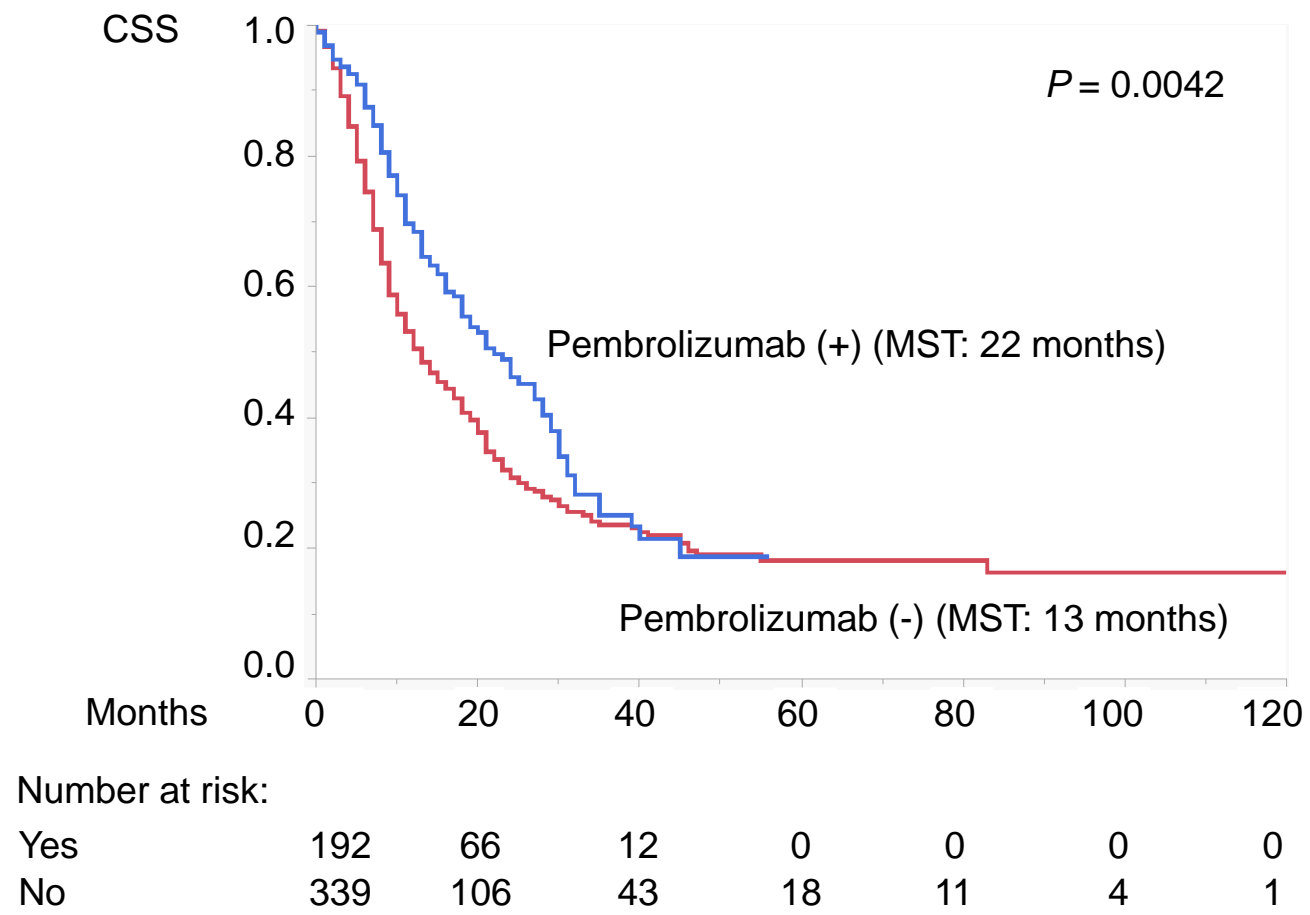**(D) Overall pembrolizumab use**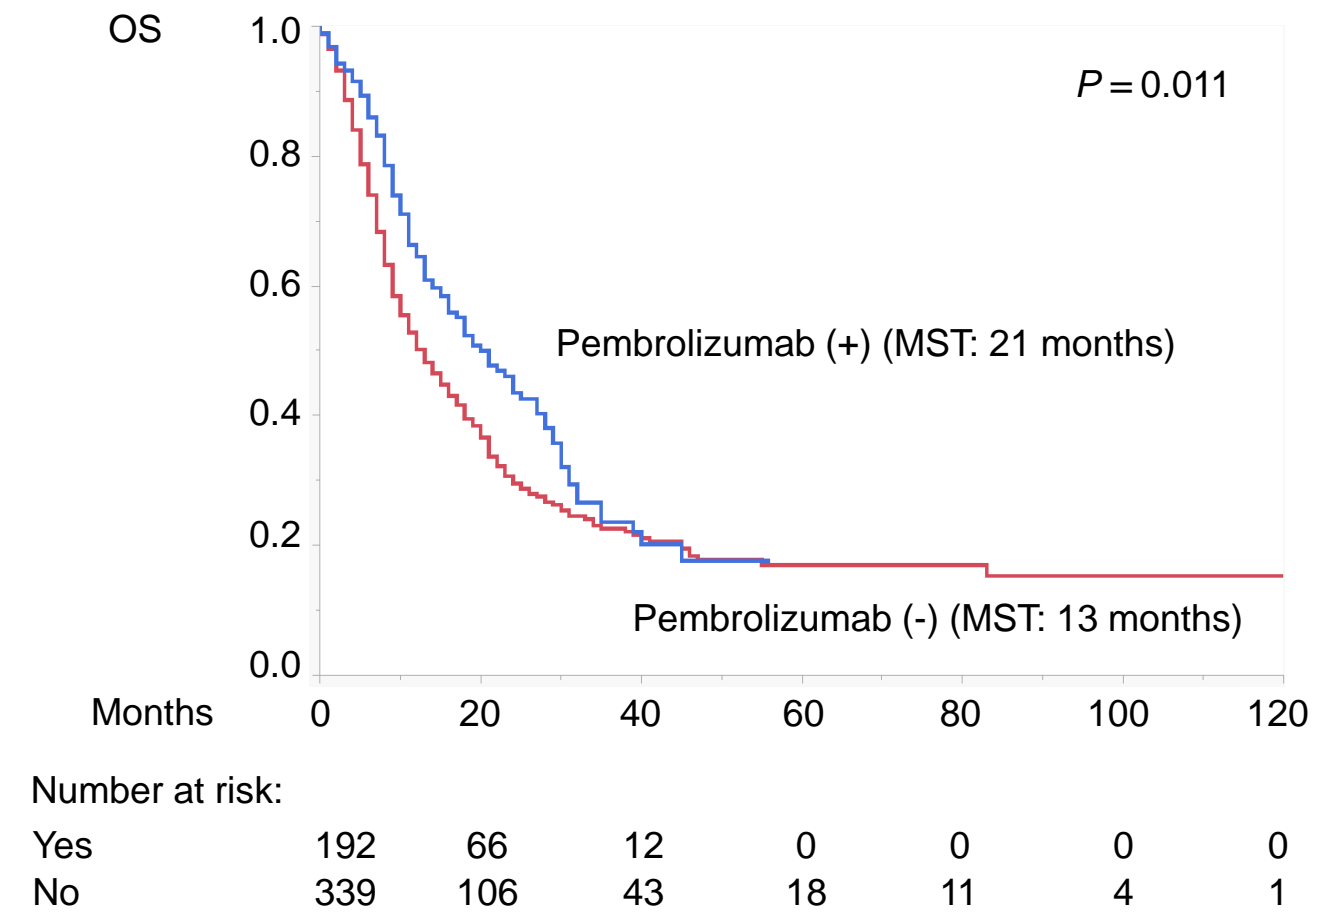**(E) Era and overall pembrolizumab use**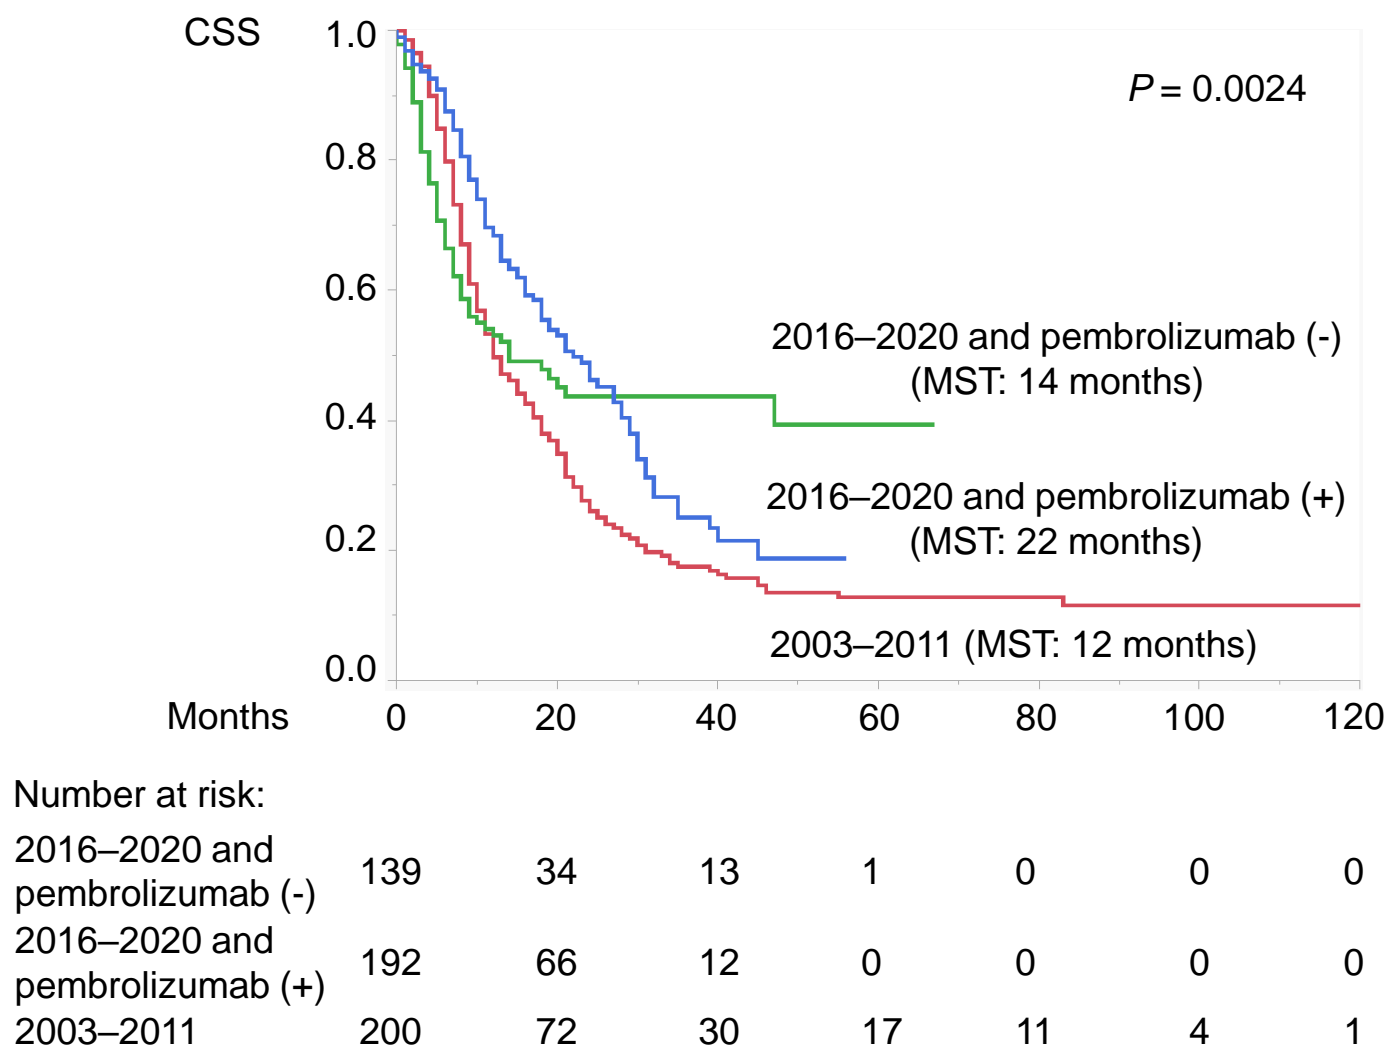**(F) Era and overall pembrolizumab use**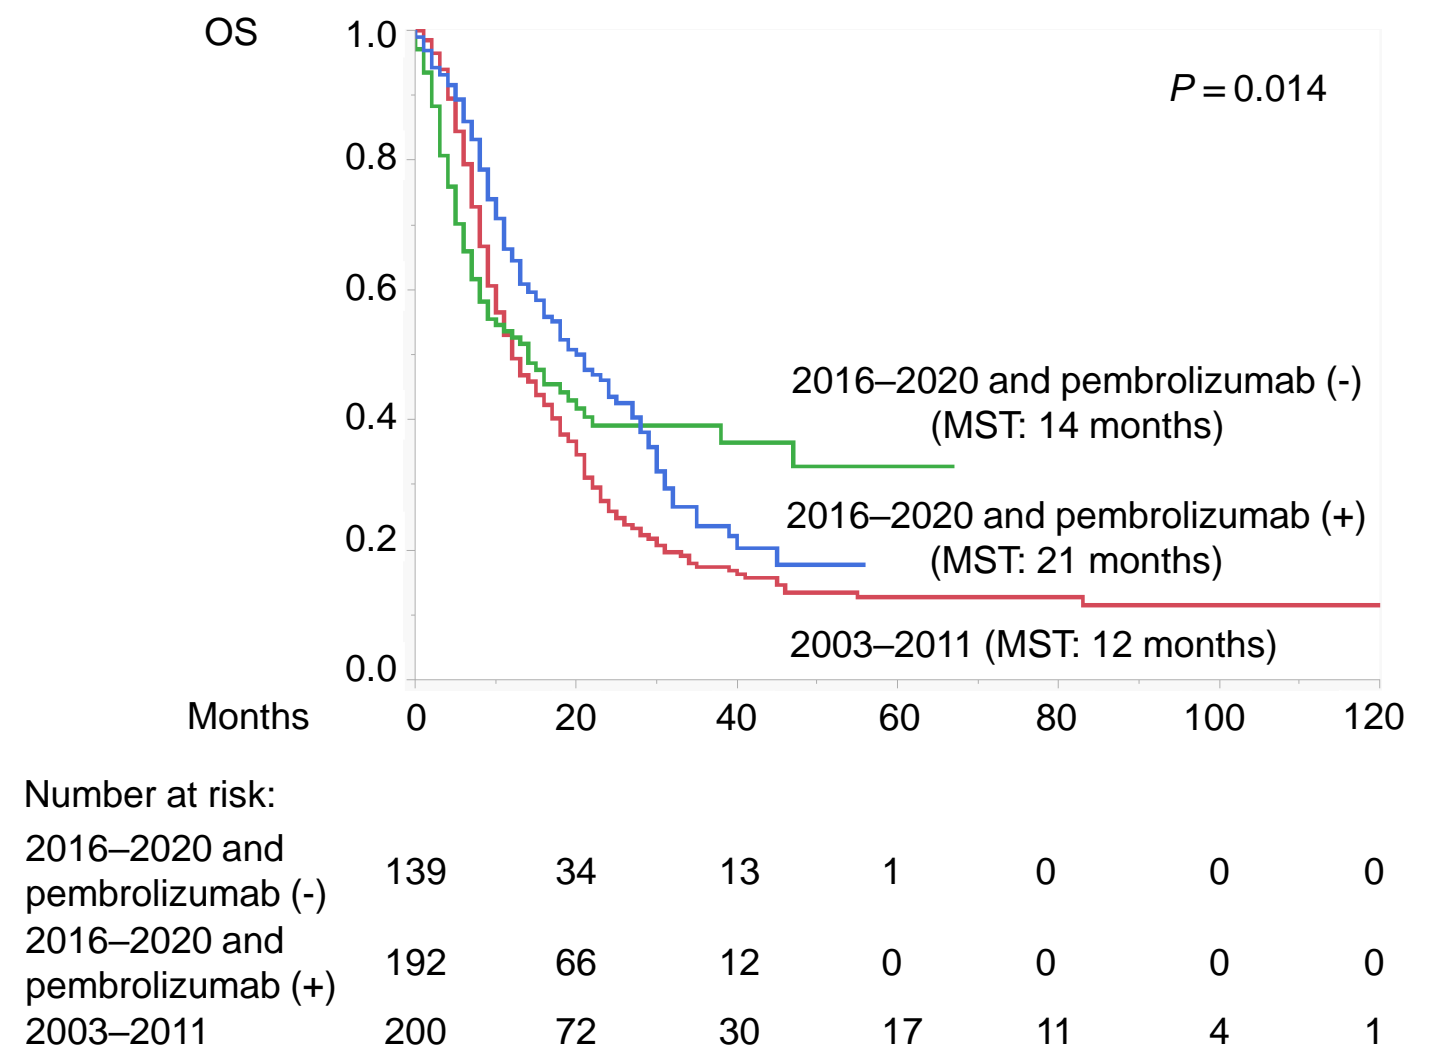

Supplement: IJU-29-1462-s004.pdf [file IJU-29-1462-s004.pdf]
